# Supplementary material
Source: publisher site journal article supplement (https://www.spandidos-publications.com/2503/downloadSupplementary)

Figure S1. Effects of LPS-PG on the inflammatory condition of MG63. Gene expression levels of the pro-inflammatory mediators, IL-6 and IL-1 $\beta$ , in MG63 cells were detected following stimulation with (A) 0, 0.5, 1  $\mu$ g/ml and 2  $\mu$ g/ml of LPS-PG for 3 h, (B) 1  $\mu$ g/ml of LPS-PG for 0-6 h, (C) 0 and 1  $\mu$ g/ml of LPS-PG for 2 h by RT-qPCR (\*\* $P$ <0.001; ns, no significant difference).

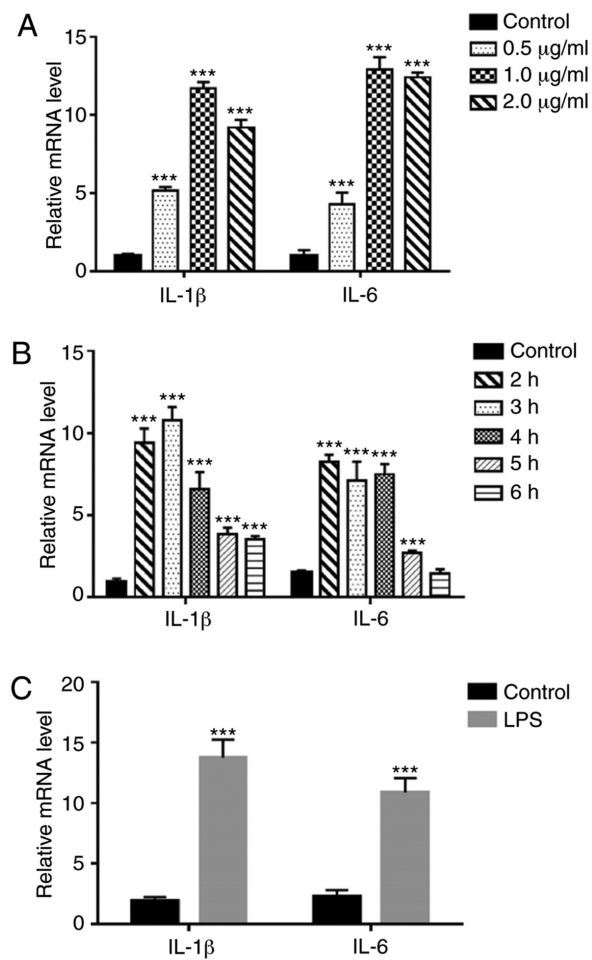

Figure S2. Differently enriched genes related to corresponding GO terms by bands in the chord plot. Genes are listed in order of logFC on the left hemisphere and GO terms are listed on the right hemisphere of the chord plot. Yellow and blue colors indicate up-regulation and down-regulation, respectively.

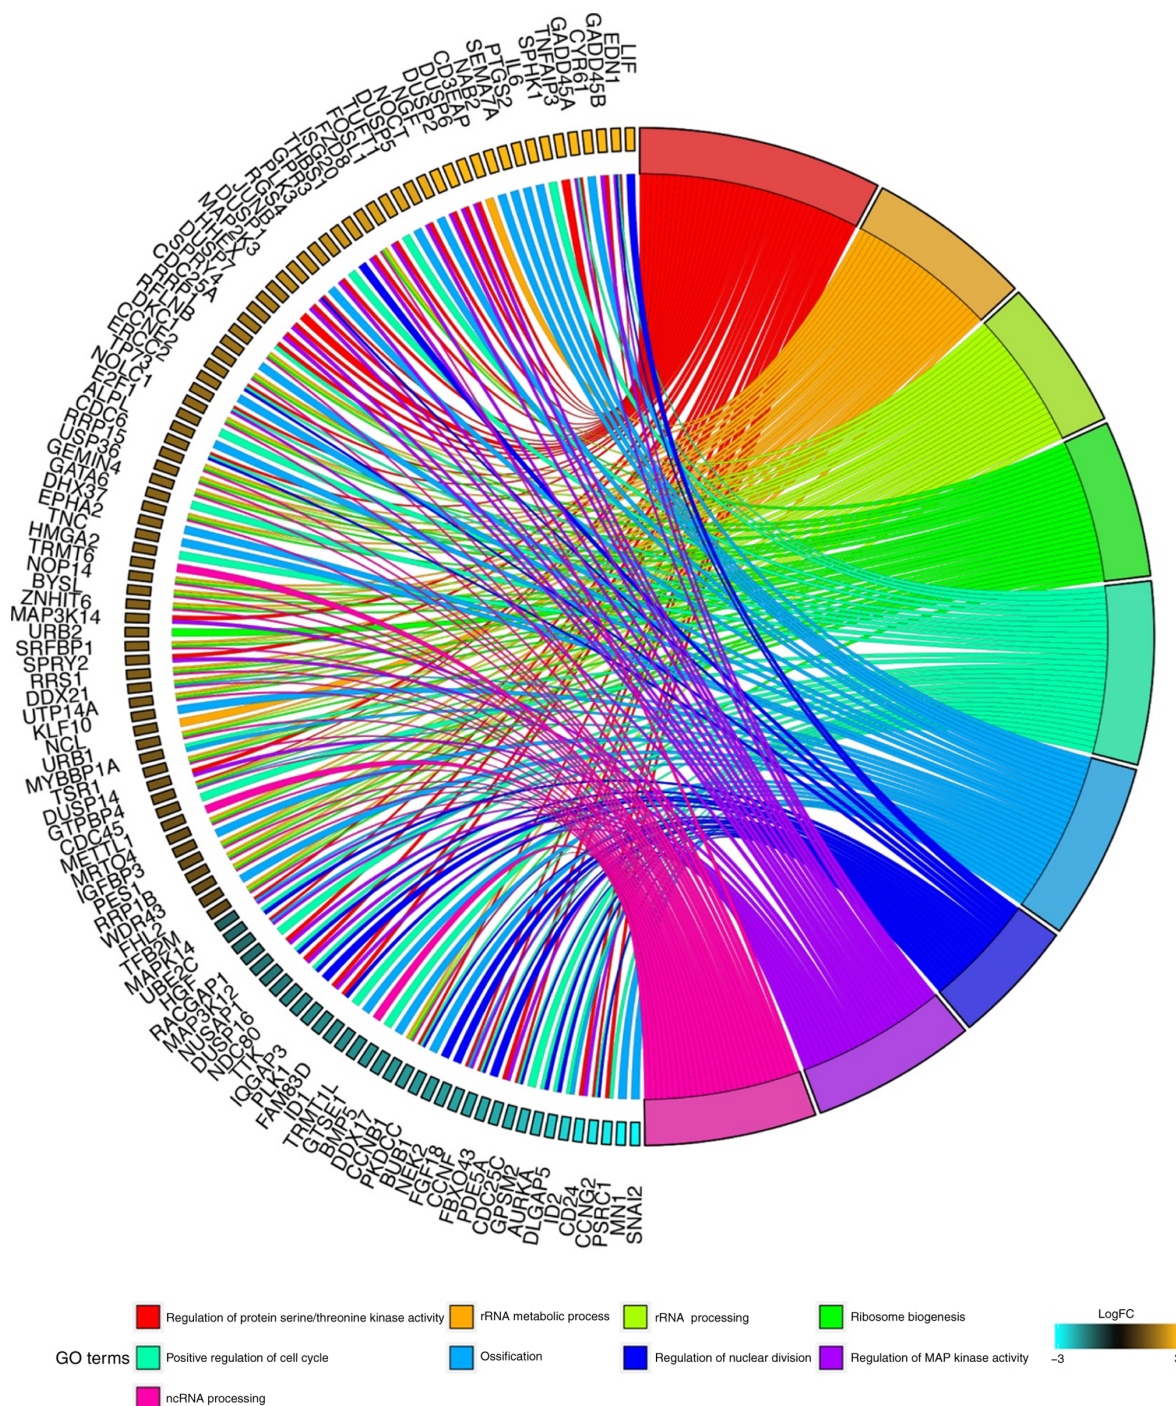

Figure S3. mRNA expression of NEAT1 in MG63 cells with or without transfection with NEAT1 overexpression plasmid.  
\*\*\*P<0.001, vs. blank control.

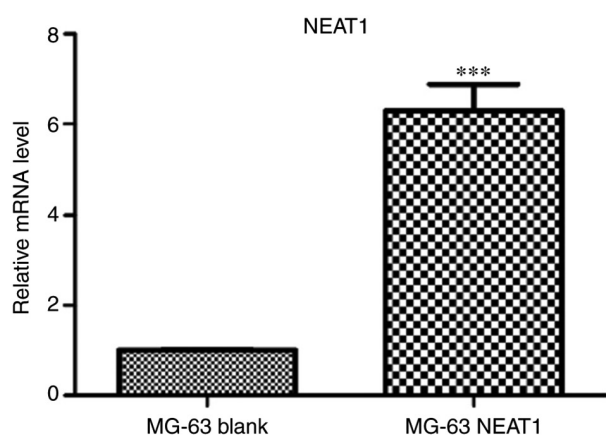

Figure S4. Scatterplots of apoptosis assay in each group detected by the Annexin V-FITC/PI dual staining kit.

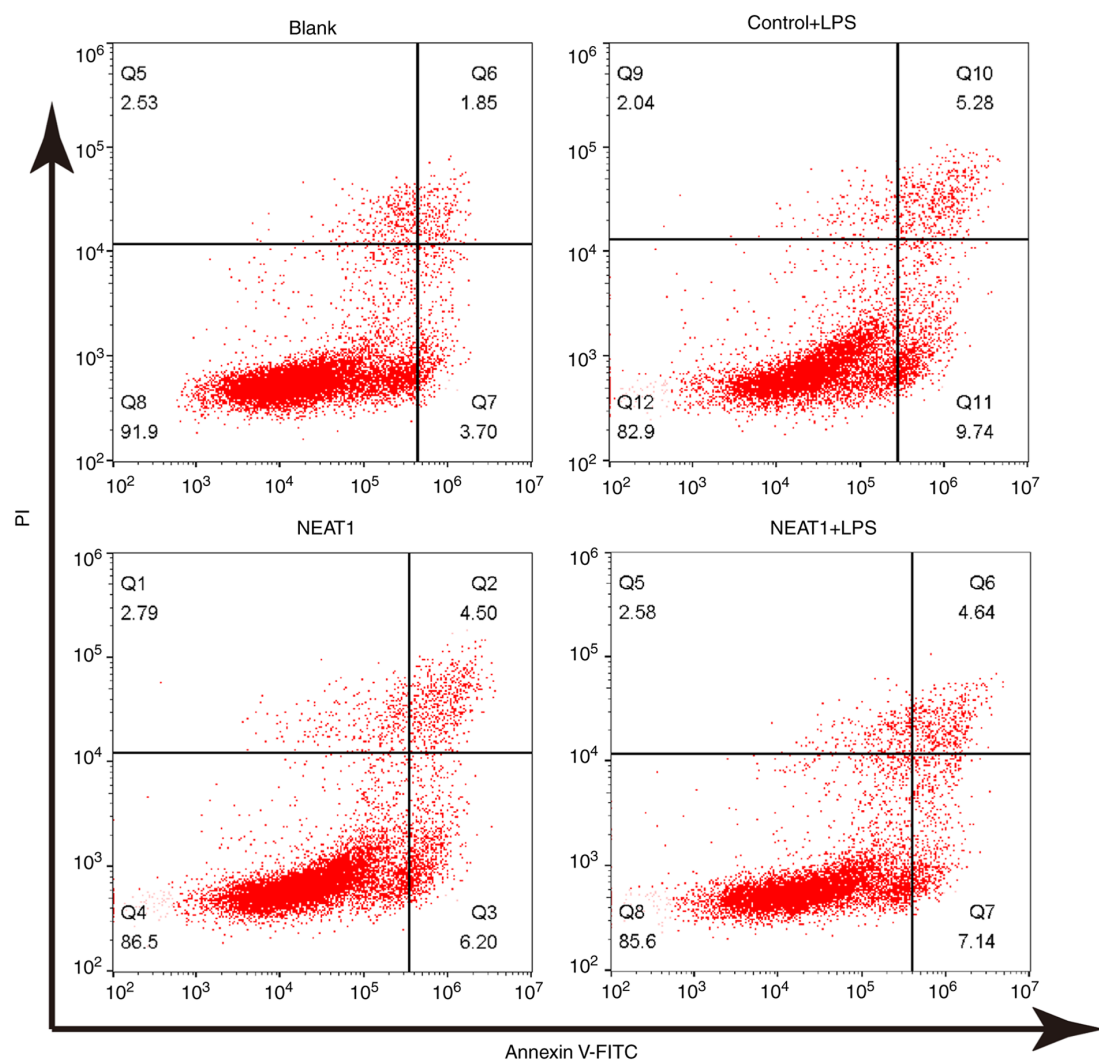



Figure S5. Plots of cell cycle assay in each group.

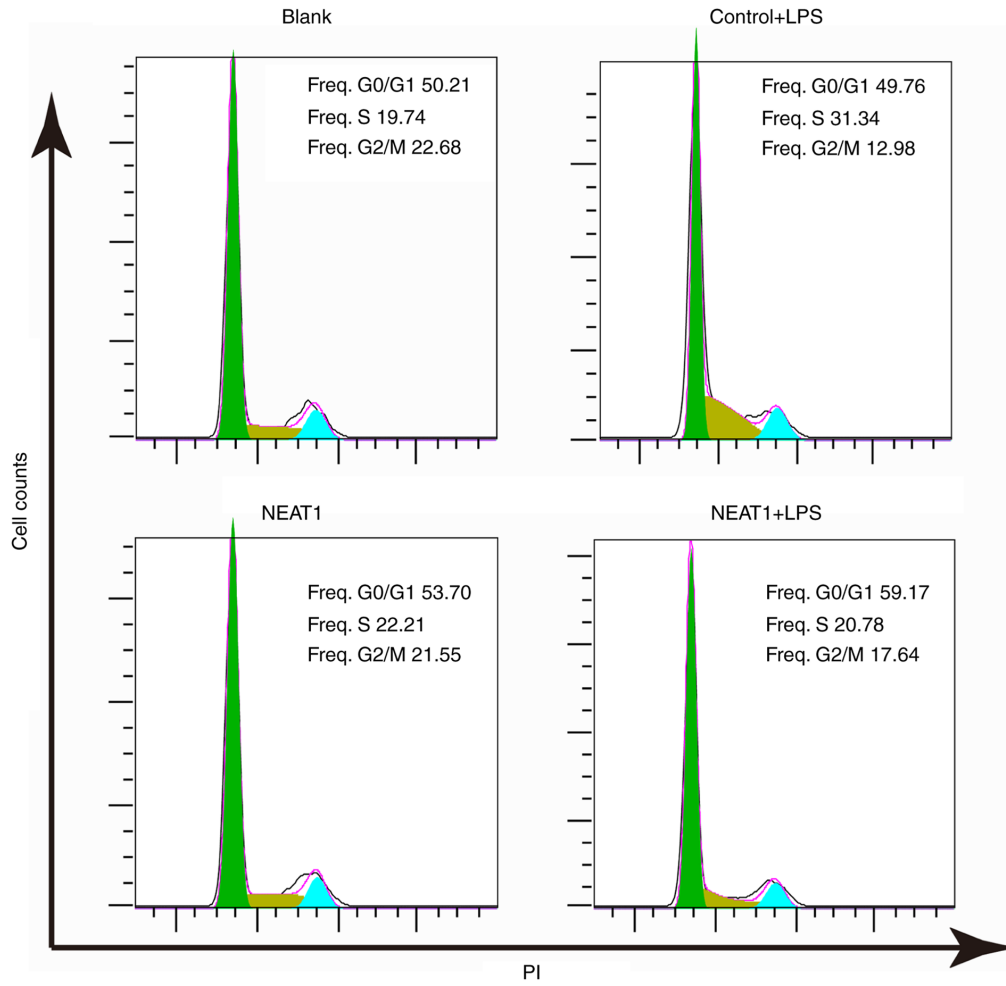

Supplement: Supplementary file 1 [file downloadSupplementary]
